1 **Title:** Neutrophil elastase inhibitor sivelestat ameliorates gefitinib-naphthalene-induced  
2 acute pneumonitis in mice

3 **Running Title:** Sivelestat resolves pneumonitis

4 **Authors' full names:**

5 Hironori Mikumo<sup>1</sup>, Toyoshi Yanagihara<sup>1</sup>, Naoki Hamada<sup>1</sup>, Eiji Harada<sup>1</sup>, Saiko Ogata-  
6 Suetsugu<sup>1</sup>, Chika Ikeda-Harada<sup>1</sup>, Masako Arimura-Omori<sup>1</sup>, Kunihiro Suzuki<sup>1</sup>, Testuya  
7 Yokoyama<sup>1</sup>, and Yoichi Nakanishi<sup>1</sup>

8 **Authors' affiliation(s):**

9 <sup>1</sup>Research Institute for Diseases of the Chest, Graduate School of Medical Sciences,  
10 Kyushu University, Fukuoka, Japan

11 **Corresponding author full contact details:**

12 Name: Toyoshi Yanagihara

13 Address: Research Institute for Diseases of the Chest, Graduate School of Medical  
14 Sciences, Kyushu University, 3-1-1 Maidashi, Higashi-ku

15 Post code: 812-8582

16 City: Fukuoka

17 Country: Japan

18 Email: [yanagiha@kokyu.med.kyushu-u.ac.jp](mailto:yanagiha@kokyu.med.kyushu-u.ac.jp)

19

20 **Key words:** Acute pneumonitis; gefitinib; neutrophil elastase inhibitor

21

22 **Summary statement:** Neutrophil elastase inhibitor sivelestat is a promising therapeutic  
23 agent for severe acute pneumonitis caused by gefitinib.

24

25

26

27

28

29

30

31

32

33

34 **ABSTRACT:**

35 Background and objective: Gefitinib, an epidermal growth factor receptor-tyrosine kinase  
36 inhibitor (EGFR-TKI), is an effective therapeutic agent for non-small cell lung cancer with  
37 EGFR mutations. It can cause severe acute pneumonitis in some patients. We previously  
38 demonstrated that mice with naphthalene-induced airway epithelial injury developed  
39 severe gefitinib-induced pneumonitis and that neutrophils played important roles in the  
40 development of the disease. This study aimed to investigate the effects of the neutrophil  
41 elastase inhibitor sivelestat on gefitinib-induced pneumonitis in mice.

42 Methods: C57BL/6J mice received naphthalene (200 mg/kg) intraperitoneally on day 0.  
43 Gefitinib (250 or 300 mg/kg) was orally administered to mice from day -1 until day 13.  
44 Sivelestat (150 mg/kg) was administered intraperitoneally from day 1 until day 13.

45 Bronchoalveolar lavage fluid (BALF) and lung tissues were sampled on day 14.

46 Results: Sivelestat treatment significantly reduced the protein level, neutrophil count,  
47 neutrophil elastase activity in BALF, and severity of histopathologic findings on day 14  
48 for mice administered with 250 mg/kg of gefitinib. Moreover, sivelestat treatment  
49 significantly improved the survival of mice administered with 300 mg/kg of gefitinib.

50 Conclusions: These results indicate that sivelestat is a promising therapeutic agent for  
51 severe acute pneumonitis caused by gefitinib.

52

53

54

55

56

57

58

59

60

61

62

63

64

65

66

67 **INTRODUCTION:**

68 Gefitinib, an epidermal growth factor receptor-tyrosine kinase inhibitor (EGFR-TKI), is an  
69 effective therapeutic agent for non-small cell lung cancer with EGFR mutations (Harada et  
70 al., 2011; Mok et al., 2009). It can cause severe acute pneumonitis in some patients.

71 Characteristics of patients who developed interstitial pneumonia included old age, poor  
72 performance status, a history of smoking, and preexisting interstitial pneumonia (Harada et  
73 al., 2011; Kudoh et al., 2008).

74 Injuries to respiratory epithelium and alveolar epithelial cells are regarded as the initial  
75 phenomena of various respiratory illnesses, such as acute respiratory distress syndrome,  
76 interstitial pneumonia, and chronic obstructive pulmonary disease.

77 Neutrophil elastase is a protease produced by neutrophils. Excessive neutrophil elastase  
78 can cause lung tissue damage by direct cytotoxicity to endothelial and epithelial cells and  
79 by degradation of key structural elements of connective tissue, such as elastin, collagen,  
80 and proteoglycan (Yamada et al., 2011; Lee and Downey, 2001).

81 Sivelestat, a small molecule (529 Da), is a neutrophil elastase inhibitor developed and  
82 produced by Ono Pharmaceutical Company in Japan (Aikawa et al., 2011). In the animal  
83 models of acute lung injury (ALI), the beneficial effects of sivelestat have been reported in  
84 bleomycin-induced inflammation and streptococcus pneumonia (Yuan et al., 2014;  
85 Yamada et al., 2011). A phase 3 study in Japan demonstrated that sivelestat improved the  
86 investigator assessment of pulmonary function and significantly reduced the duration of  
87 intensive care required for patients with ALI associated with systemic inflammatory  
88 response syndrome (SIRS) (Tamakuma et al., 2004). In 2002, sivelestat was approved in  
89 Japan for the treatment of ALI associated with SIRS (Aikawa et al., 2011). After approval,  
90 a phase 4 study indicated that it contributed to early weaning from mechanical ventilation  
91 (Aikawa et al., 2011). The beneficial effects of sivelestat have also been reported in several  
92 other models, including lipopolysaccharide (LPS)-induced lung inflammation, ozone-  
93 induced airway response, and bleomycin-induced pulmonary fibrosis (Yuan et al., 2014;  
94 Matsumoto et al., 1999; Takemasa et al., 2012).

95 Pulmonary stem cells are important for tissue recovery. The club cell is a type of  
96 pulmonary stem cell found in the distal airway. Stem cell abnormality is considered to  
97 promote chronic lung injury and lung fibrosis (Harada et al., 2011; Gazdhar et al., 2007).  
98 Naphthalene has club cell-selective cytotoxicity (Harada et al., 2011; Van Winkle et al.,  
99 1995; Stripp et al., 1995). Therefore, we previously used a naphthalene-induced lung

100 injury model as an animal model containing a risk factor of gefitinib-induced pneumonia.  
101 We found that gefitinib administration after naphthalene treatment prolonged ALI with  
102 neutrophil infiltration on day 14. Laser capture microdissection and microarray analysis of  
103 the terminal bronchial epithelial cells showed upregulation of the genes included—*S100a8*,  
104 *S100a6*, *Stfa3*, *Trim23*, and *Mugl*, which are known to participate in inflammatory cell  
105 chemotaxis, activation, and migration (Harada et al., 2011; Raquil et al., 2008; Ozato et al.,  
106 2008). Although the precise mechanisms involved remain unclear, gefitinib treatment  
107 prolonged lung inflammation by upregulating neutrophil chemoattractant genes from  
108 peripheral epithelial cells. Therefore, we hypothesize that sivelestat plays a protective role  
109 against gefitinib-induced lung injury by inhibiting neutrophilic inflammation.

110

## 111 **RESULTS:**

### 112 **Sivelestat improved the survival rate of gefitinib-induced pneumonitis in mice**

113 The administration of 300-mg/kg gefitinib with 150-mg/kg sivelestat following  
114 naphthalene significantly improved the survival rate on day 14 compared with that of  
115 300 mg/kg gefitinib following naphthalene (Figure 2).

116

### 117 **Sivelestat ameliorated the loss of body weight of gefitinib-induced pneumonitis in mice**

118 **mice**  
119 We measured mice body weight to determine the general influence of ALI. Weight loss is  
120 a good marker for the severity of naphthalene-induced lung injury (Harada et al., 2011;  
121 Verschoyle et al., 1997). On day 7, the body weights of mice treated with naphthalene  
122 alone were significantly decreased; however, by day 14, the body weights returned to the  
123 level of the control injected with corn oil. On day 14, body weights of mice treated with  
124 250 mg/kg gefitinib following naphthalene remained significantly decreased compared  
125 with that of mice treated with naphthalene alone, whereas the body weights of mice treated  
126 with 250 mg/kg gefitinib and 150 mg/kg sivelestat following naphthalene were  
127 significantly increased compared with that of mice treated with 250 mg/kg gefitinib  
128 following naphthalene (Figure 3).

129

### 130 **Sivelestat ameliorated the lung inflammation of gefitinib-induced pneumonitis in mice**

131 **mice**  
132 Histopathological examination

133 We used histologic cell analysis to examine the degree of inflammatory cell infiltration.  
134 Naphthalene alone induced neutrophil infiltration on day 7 but not on day 14 in the lung  
135 tissue, as previously described (Harada et al., 2011). The administration of 250 mg/kg  
136 gefitinib following naphthalene aggravated neutrophil infiltration and induced alveolar  
137 hemorrhage on day 14 (Figure 4A). In contrast, the administration of 250 mg/kg gefitinib  
138 with 150 mg/kg sivelestat following naphthalene significantly decreased the pathologic  
139 grade compared with that of 250 mg/kg gefitinib following naphthalene (Figure 4B).  
140 BALF analysis  
141 On day 14, the number of neutrophils, total cell count, and protein concentration in BALF  
142 of mice treated with 250 mg/kg gefitinib following naphthalene were significantly  
143 increased compared with those of mice treated with naphthalene alone. On day 14, the  
144 administration of 250 mg/kg gefitinib and 150 mg/kg sivelestat following naphthalene  
145 significantly decreased the number of neutrophils, total cell count, and protein  
146 concentration in BALF compared with that with 250 mg/kg gefitinib following  
147 naphthalene (Figure 5).  
148 In addition, the administration of 250 mg/kg gefitinib and 150 mg/kg sivelestat following  
149 naphthalene significantly decreased the level of IL-8 (Figure 6A) and neutrophil elastase  
150 activity (Figure 6B) in BALF compared with those resulting from the administration of  
151 250 mg/kg gefitinib following naphthalene.

152

## 153 **DISCUSSION**

154 As we reported previously, the presumed sequence of the mechanism of gefitinib–  
155 naphthalene pneumonitis is as follows: 1) the upregulation of neutrophil chemoattractant  
156 genes in bronchiolar epithelial cells; 2) neutrophil migration into alveolar space and  
157 interstitial tissues, and; 3) release of neutrophil elastase from neutrophils, resulting in lung  
158 tissue damage.

159 IL-8 is produced by alveolar epithelial cell line (A549), airway epithelial cells, and  
160 inflammatory cells, such as macrophages and neutrophils. IL-8 is a well-known  
161 neutrophilic chemoattractant. Some studies have reported that gefitinib induces the  
162 production of IL-8 from alveolar epithelial cell line (A549). Neutrophil elastase induces  
163 the release of IL-8 from bronchial epithelial cells (Yamada et al., 2011; Nakamura et al.,  
164 1992), which in turn recruits additional neutrophils. Our study indicated that  
165 administration of sivelestat decreased neutrophil elastase, which in turn inhibited the level

166 of IL-8 in gefitinib–naphthalene-induced pneumonitis. In other words, sivelestat treatment  
167 could halt the negative spiral of lung injury. A limitation of the current study was that we  
168 could not identify the IL-8 producing cells targeted by sivelestat; therefore, further studies  
169 are required.

170 A significant reduction in the number of club cells has been observed in the airway  
171 epithelium of chronic tobacco smokers (Nomori et al., 1994). The naphthalene-induced  
172 club cell injury in a mice model may be representative of patients at a high risk of  
173 gefitinib-induced pneumonitis. This suggests that the presence of peripheral airway  
174 damage may increase the susceptibility of patients with lung cancer to interstitial  
175 pneumonia during treatment with gefitinib.

176 In conclusion, we demonstrated a treatment strategy for ALI caused by gefitinib. Currently,  
177 new generation EGFR-TKIs, such as afatinib and osimertinib, are used for treating non-  
178 small cell lung cancer with EGFR mutations. It is well known that the new generation  
179 EGFR-TKIs also induce pneumonitis; therefore, the current study should be repeated for  
180 the new generation EFGR-TKIs.

181

## 182 **MATERIALS AND METHODS:**

### 183 **Animal treatment**

184 The experiments were approved by the Committee on Ethics Regarding Animal  
185 Experiments of Kyushu University. C57BL/6 female mice (7 weeks old; SLC, Inc,  
186 Shizuoka Japan) were used in all experiments.

187 Naphthalene (Wako Pure Chemical Industries, Osaka, Japan) was injected  
188 intraperitoneally on day 0 (200 mg/kg). Gefitinib (Caymann Chemical, Arizona, USA)  
189 stirred into 1% Tween 80 (Wako) was daily administered orally on days –1 to 13. We  
190 administrated gefitinib at two doses: 1) 250 mg/kg as a tolerated dose and 2) 300 mg/day  
191 as the 50% lethal dose (LC<sub>50</sub>). The neutrophil elastase inhibitor sivelestat (Ono  
192 Pharmaceutical, Osaka, Japan) in saline was daily injected intraperitoneally on days 1 to  
193 13 (150 mg/kg). A scheme of the administration schedule is shown in Figure 1.

194

### 195 **Histopathological evaluation**

196 Histopathology was performed as previously described (Harada et al., 2011; Hamada et al.,  
197 2008).

198 The right lung was fixed in 10% buffered formalin and embedded in paraffin, and the lung  
199 sections were stained with hematoxylin and eosin. The pathological grade of inflammation  
200 in the whole area of the midsagittal was evaluated under  $\times 200$  magnification and  
201 determined according to the following criteria: 0 = no lung abnormality; 1 = presence of  
202 inflammation involving  $<25\%$  of the lung parenchyma; 2 = lesions involving 25–50% of  
203 the lung; and 3 = lesions involving  $>50\%$  of the lung.

204

#### 205 Bronchoalveolar lavage

206 The bronchoalveolar lavage (BAL) method and analysis was performed as previously  
207 described (Harada et al., 2011; Hamada et al., 2008). After counting the cell numbers in  
208 BAL fluid (BALF), cells were cytospun and stained with Diff-Quick for classification. The  
209 BALF supernatant was freeze-dried using a lyophilizer. The lyophilized samples were  
210 dissolved to determine total protein concentrations, interleukin-8 (IL-8), and neutrophil  
211 elastase activity. Total protein concentrations in BALF were measured using the Bio-Rad  
212 Protein Assay.

213

#### 214 ELISA for assessment of IL-8 in the BALF

215 The concentration of IL-8 in BALF was determined using mouse cytokine ELISA kits  
216 (R&D Systems, Minneapolis, MN, USA).

217

#### 218 Neutrophil elastase activity

219 Neutrophil elastase activity in BALF was determined using the highly neutrophil elastase-  
220 specific synthetic substrate *N*-methoxysuccinyl-Ala-Ala-Pro-Val *p*-nitroanilide. Briefly,  
221 samples were incubated in 0.1-M Tris-HCl buffer (pH 8.0) containing 0.5-M NaCl and 1-  
222 mM substrate for 24 h at 37 °C. After incubation, *p*-nitroaniline was measured  
223 spectrophotometrically at 405 nm, considered to be a measure of neutrophil elastase  
224 activity (Hagio et al., 2004; Yanagihara et al., 2007).

225

#### 226 Statistical Analysis

227 The Student's t-test was used for the comparison of body weight, number of BALF cells,  
228 protein concentration, IL-8 concentration, neutrophil elastase activity, histopathological  
229 grade, and survival curves.  $P < 0.05$  was considered significant. Statistical analysis was  
230 performed in the statistical software package JMP version 11 (SAS Institute, Cary, NC).

231 **ACKNOWLEDGEMENTS:**

232 We thank S. Tamura for technical assistance. Special thanks to Ono Pharmaceutical Co,  
233 Ltd. for the provision of sivelestat as the study medication.

234

235 **COMPETING INTERESTS:**

236 The authors declare no competing or financial interests

237

238 **AUTHOR CONTRIBUTIONS:**

239 All authors designed research. H.M. and S.-O. S. performed research. T.Y. , N.H., E. H.,  
240 C.-I.H., M.-A.O., K. S., T. Y., and T.N. provided assistance. H.M. and S.-O. S. analyzed  
241 data. H.M. and T. Y. wrote the paper. All authors approved the final manuscript.

242

243 **REFERENCES:**

244 **Aikawa, N., Ishizaka, A., Hirasawa, H., Shimazaki, S., Yamamoto, Y., Sugimoto, H.,**  
245 **Shinozaki, M., Taenaka, N., Endo, S., Ikeda, T., et al.** (2011). Reevaluation of  
246 the efficacy and safety of the neutrophil elastase inhibitor, Sivelestat, for the  
247 treatment of acute lung injury associated with systemic inflammatory response  
248 syndrome; a phase IV study. *Pulm. Pharmacol. Ther.* **24**, 549-554.

249 **Gazdhar, A., Fachinger, P., Van Leer, C., Pierog, J., Gugger, M., Friis, R., Schmid, R.**  
250 **A. and Geiser, T.** (2007). Gene transfer of hepatocyte growth factor by  
251 electroporation reduces bleomycin-induced lung fibrosis. *Am. J. Physiol. Lung Cell*  
252 *Mol. Physiol.* **292**, L529-L536.

253 **Hagio, T., Matsumoto, S., Nakao, S., Abiru, T., Ohno, H. and Kawabata, K.** (2004).  
254 Elastase inhibition reduced death associated with acid aspiration-induced lung  
255 injury in hamsters. *Eur. J. Pharmacol.* **488**, 173-180.

256 **Hamada, N., Maeyama, T., Kawaguchi, T., Yoshimi, M., Fukumoto, J., Yamada, M.,**  
257 **Yamada, S., Kuwano, K. and Nakanishi, Y.** (2008). The role of high mobility  
258 group box1 in pulmonary fibrosis. *Am. J. Respir. Cell Mol. Biol.* **39**, 440-447.

259 **Harada, C., Kawaguchi, T., Ogata-Suetsugu, S., Yamada, M., Hamada, N., Maeyama,**  
260 **T., Souzaki, R., Tajiri, T., Taguchi, T., Kuwano, K. and Nakanishi, Y.** (2011).  
261 EGFR tyrosine kinase inhibition worsens acute lung injury in mice with repairing  
262 airway epithelium. *Am. J. Respir. Crit. Care Med.* **183**, 743-751.



- 263 **Kudoh, S., Kato, H., Nishiwaki, Y., Fukuoka, M., Nakata, K., Ichinose, Y., Tsuboi, M.,**  
264 **Yokota, S., Nakagawa, K., Suga, M., et al.** (2008). Interstitial lung disease in  
265 Japanese patients with lung cancer: a cohort and nested case-control study. *Am. J.*  
266 *Respir. Crit. Care Med.* **177**, 1348-1357.
- 267 **Lee, W. L. and Downey, G. P.** (2001). Leukocyte elastase: physiological functions and  
268 role in acute lung injury. *Am. J. Respir. Crit. Care Med.* **164**, 896-904.
- 269 **Matsumoto, K., Aizawa, H., Inoue, H., Koto, H., Nakano, H. and Hara, N.** (1999).  
270 Role of neutrophil elastase in ozone-induced airway responses in guinea-pigs. *Eur.*  
271 *Respir. J.* **14**, 1088-1094.
- 272 **Mok, T. S., Wu, Y. L., Thongprasert, S., Yang, C. H., Chu, D. T., Saijo, N.,**  
273 **Sunpaweravong, P., Han, B., Margono, B., Ichinose, Y., et al.** (2009). Gefitinib  
274 Or Carboplatin-Paclitaxel In Pulmonary Adenocarcinoma. *N. Engl. J. Med.* **361**,  
275 947-957.
- 276 **Nakamura, H., Yoshimura, K., Mcelvaney, N. G. and Crystal, R. G.** (1992).  
277 Neutrophil elastase in respiratory epithelial lining fluid of individuals with cystic  
278 fibrosis induces interleukin-8 gene expression in a human bronchial epithelial cell  
279 line. *J. Clin. Invest.* **89**, 1478-1484.
- 280 **Nomori, H., Kobayashi, R., Iga, R., Fuyuno, G., Morinaga, S. and Torikata, C.** (1994).  
281 [Clinicopathological examination of the relation between Clara cells and smoking].  
282 *Kyobu Geka*, **47**, 888-891.
- 283 **Ozato, K., Shin, D. M., Chang, T. H. and Morse, H. C.** (2008). TRIM family proteins  
284 and their emerging roles in innate immunity. *Nat. Rev. Immunol.* **8**, 849-860.
- 285 **Raquil, M. A., Anceriz, N., Rouleau, P. and Tessier, P. A.** (2008). Blockade of  
286 antimicrobial proteins S100A8 and S100A9 inhibits phagocyte migration to the  
287 alveoli in streptococcal pneumonia. *J. Immunol.* **180**, 3366-3374.
- 288 **Stripp, B. R., Maxson, K., Mera, R. and Singh, G.** (1995). Plasticity of airway cell  
289 proliferation and gene expression after acute naphthalene injury. *Am. J. Physiol.*  
290 **269**, L791-L799.
- 291 **Takemasa, A., Ishii, Y. and Fukuda, T.** (2012). A neutrophil elastase inhibitor prevents  
292 bleomycin-induced pulmonary fibrosis in mice. *Eur. Respir. J.* **40**, 1475-1482.
- 293 **Tamakuma, S., Ogawa, M., Aikawa, N., Kubota, T., Hirasawa, H., Ishizaka, A.,**  
294 **Taenaka, N., Hamada, C., Matsuoka, S. and Abiru, T.** (2004). Relationship

295 between neutrophil elastase and acute lung injury in humans. *Pulm. Pharmacol.*  
296 *Ther.* **17**, 271-279.

297 **Van Winkle, L. S., Buckpitt, A. R., Nishio, S. J., Isaac, J. M. and Plopper, C. G.**

298 (1995). Cellular response in naphthalene-induced Clara cell injury and bronchiolar  
299 epithelial repair in mice. *Am. J. Physiol.* **269**, L800-L818.

300 **Verschoyle, R. D., Martin, J. and Dinsdale, D.** (1997). Selective inhibition and induction  
301 of CYP activity discriminates between the isoforms responsible for the activation  
302 of butylated hydroxytoluene and naphthalene in mouse lung. *Xenobiotica.* **27**, 853-  
303 864.

304 **Yamada, K., Yanagihara, K., Araki, N., Harada, Y., Morinaga, Y., Izumikawa, K.,**  
305 **Takeya, H., Yamamoto, Y., Hasegawa, H., Kohno, S., et al.** (2011). In vivo  
306 efficacy of KRP-109, a novel elastase inhibitor, in a murine model of severe  
307 pneumococcal pneumonia. *Pulm. Pharmacol. Ther.* **24**, 660-665.

308 **Yanagihara, K., Fukuda, Y., Seki, M., Izumikawa, K., Miyazaki, Y., Hirakata, Y.,**  
309 **Tsukamoto, K., Yamada, Y., Kamhira, S. and Kohno, S.** (2007). Effects of  
310 specific neutrophil elastase inhibitor, sivelestat sodium hydrate, in murine model of  
311 severe pneumococcal pneumonia. *Exp. Lung. Res.* **33**, 71-80.

312 **Yuan, Q., Jiang, Y. W. and Fang, Q. H.** (2014). Improving effect of Sivelestat on  
313 lipopolysaccharide-induced lung injury in rats. *APMIS*, **122**, 810-817.

314

### 315 **FIGURE LEGENDS:**

316 **Figure 1.** Experimental scheme detailing the administration of naphthalene, gefitinib, and  
317 sivelestat. po: oral administration, ip: intraperitoneal administration

318 **Figure 2.** Kaplan–Meier survival curve

319 Survival study of mice with the administration of 300 mg/kg gefitinib and 150 mg/kg  
320 sivelestat following naphthalene improved the survival rate compared with that of  
321 300 mg/kg gefitinib following naphthalene ( $n = 10$ ).  $*P < 0.05$ .

322 **Figure 3.** Changes in mice body weight over time.

323 Body weights of mice treated with naphthalene alone were significantly decreased on  
324 day 7; however, by day 14, the body weights returned to the level of the control. On day 14,  
325 the body weights of mice treated with 250 mg/kg gefitinib following naphthalene remained  
326 significantly decreased compared with that of mice treated with naphthalene alone,  
327 whereas the body weights of mice treated with 250 mg/kg gefitinib and 150 mg/kg

328 sivelestat following naphthalene were significantly increased compared with those of mice  
329 at treated with 250 mg/kg gefitinib following naphthalene.

330 Compared with control group at the same point ( $n = 7$ ).  $*P < 0.05$ ,  $**P < 0.01$ .

331 **Figure 4.** Histologic assessment of lung tissues on day 14. (A) Hematoxylin and eosin  
332 staining. The administration of 250 mg/kg gefitinib following naphthalene significantly  
333 induced neutrophil infiltration and acute lung injury. The administration of 250 mg/kg  
334 gefitinib and 150 mg/kg sivelestat following naphthalene improved neutrophil infiltration  
335 compared with that with 250 mg/kg gefitinib following naphthalene ( $n = 5$ ), Scale bars:  
336 100  $\mu\text{m}$ . (B) Pathologic grade of lung tissues on day 14 ( $n = 5$ ).  $**P < 0.01$ .

337 **Figure 5.** Bronchoalveolar lavage fluid (BALF) analysis on day 14

338 (A) The administration of 250 mg/kg gefitinib following naphthalene significantly induced  
339 the upregulation of total cell count and neutrophil recruitment, which were decreased by  
340 administration of 250 mg/kg gefitinib and 150 mg/kg sivelestat following naphthalene  
341 ( $n = 5$ ).  $**P < 0.01$ .

342 (B) The administration of 250 mg/kg gefitinib following naphthalene significantly induced  
343 the upregulation of protein concentration, which was decreased by the administration of  
344 250 mg/kg gefitinib and 150 mg/kg sivelestat following naphthalene ( $n = 5$ ).  $**P < 0.01$ .

345 **Figure 6.** Interleukin-8 (IL-8) and neutrophil elastase activity in bronchoalveolar lavage  
346 fluid (BALF) on day 14

347 (A) IL-8 was increased by the administration of 250 mg/kg gefitinib following naphthalene  
348 and was decreased by administration of 250 mg/kg gefitinib and 150 mg/kg sivelestat  
349 following naphthalene ( $n = 5$ ).  $*P < 0.05$ .

350 (B) Neutrophil elastase was increased by the administration of 250 mg/kg gefitinib  
351 following naphthalene and was decreased by administration of 250 mg/kg gefitinib and  
352 150 mg/kg sivelestat following naphthalene ( $n = 5$ ).  $**P < 0.01$ .

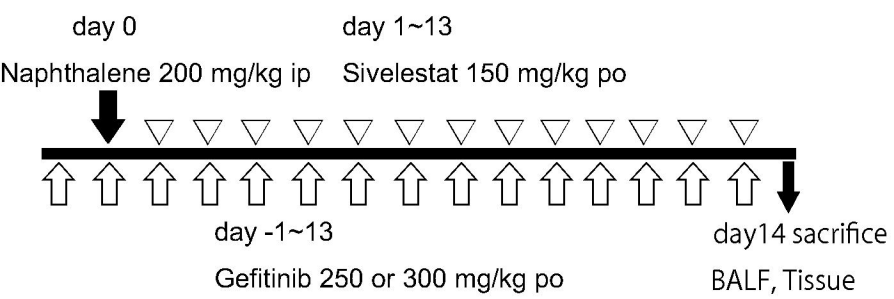

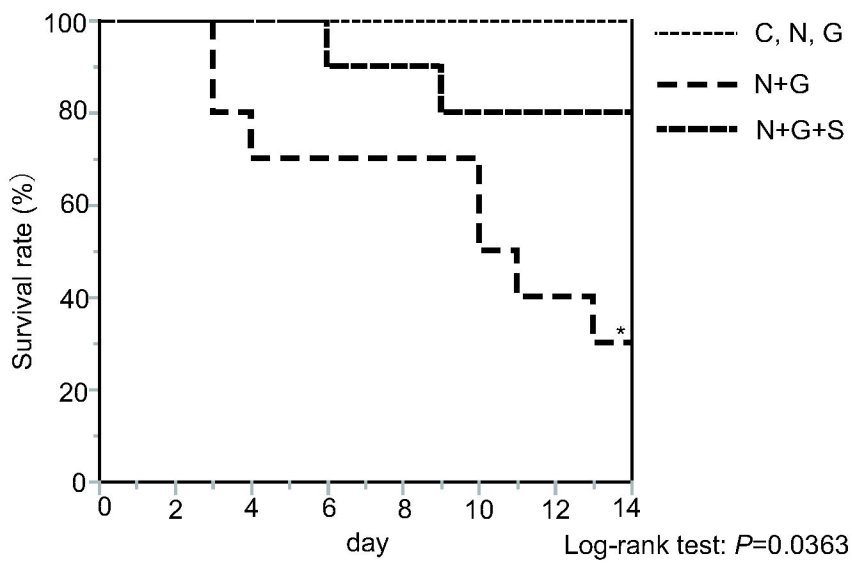

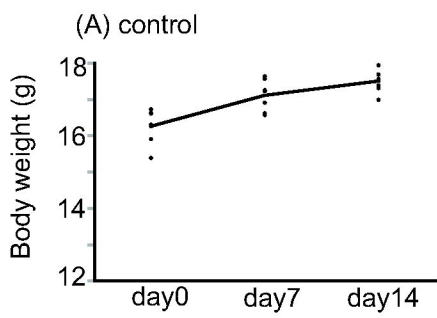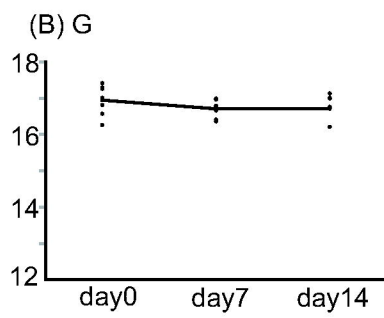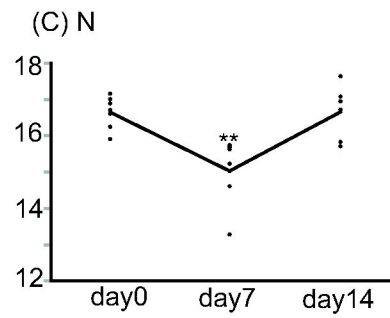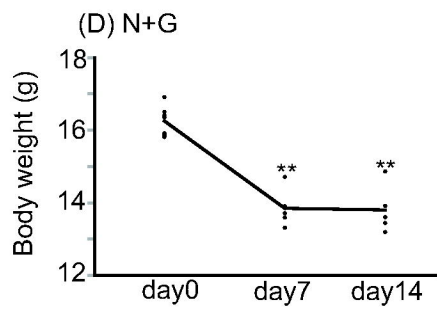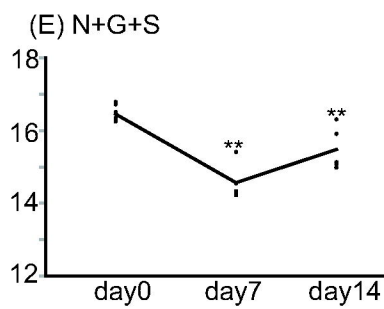

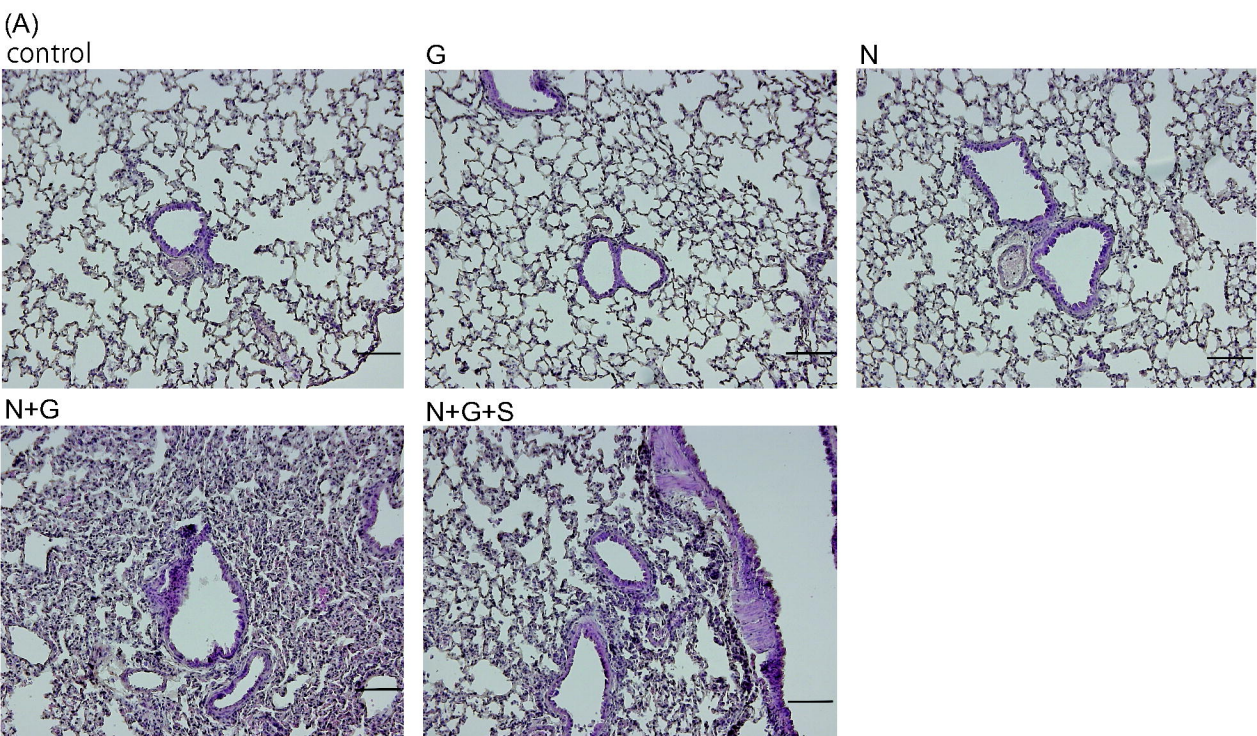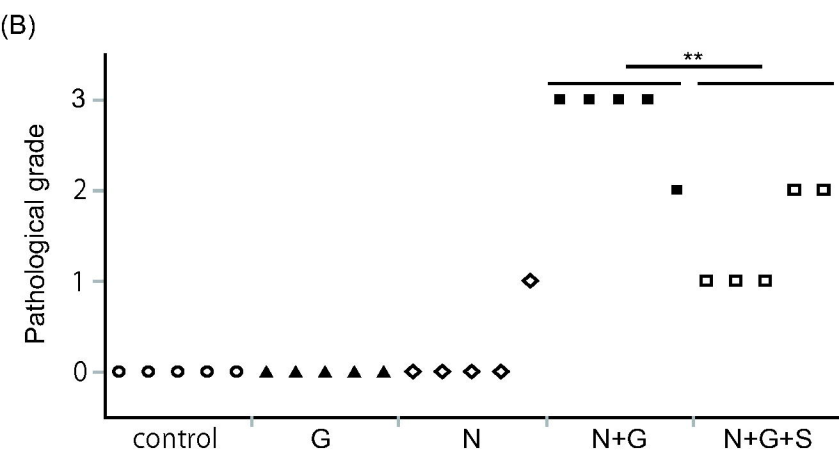

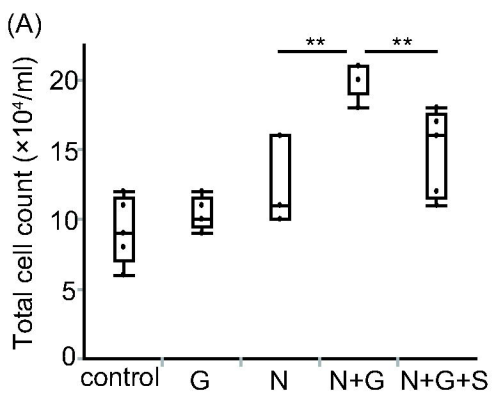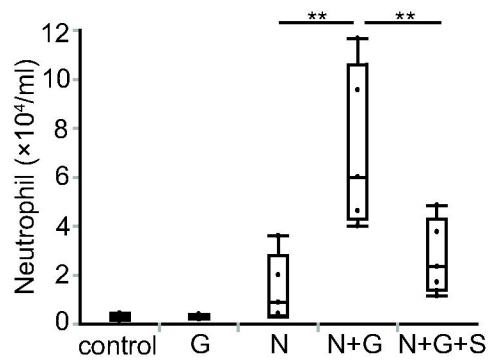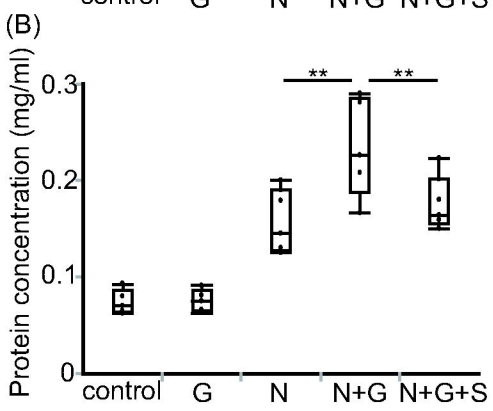



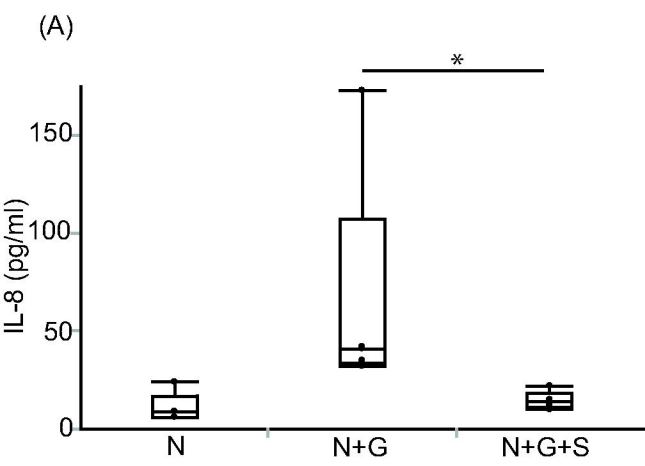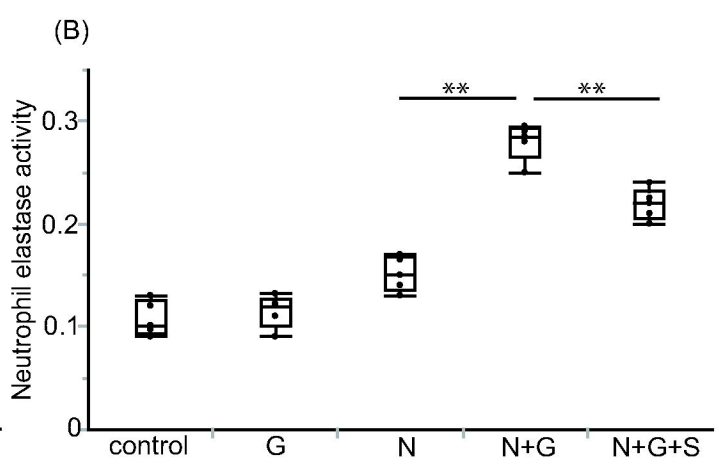

Source: http://biorxiv.org/content/10.1101/108464v1.full.pdf
